# Supplementary material for: Explaining Deep Neural Networks for Knowledge Discovery in Electrocardiogram Analysis
Source: bioRxiv or medRxiv preprint supplement (doi:10.1101/2021.01.06.20248927), 2021-01-08
Supplement: Supplementary file [file media-1.pdf]

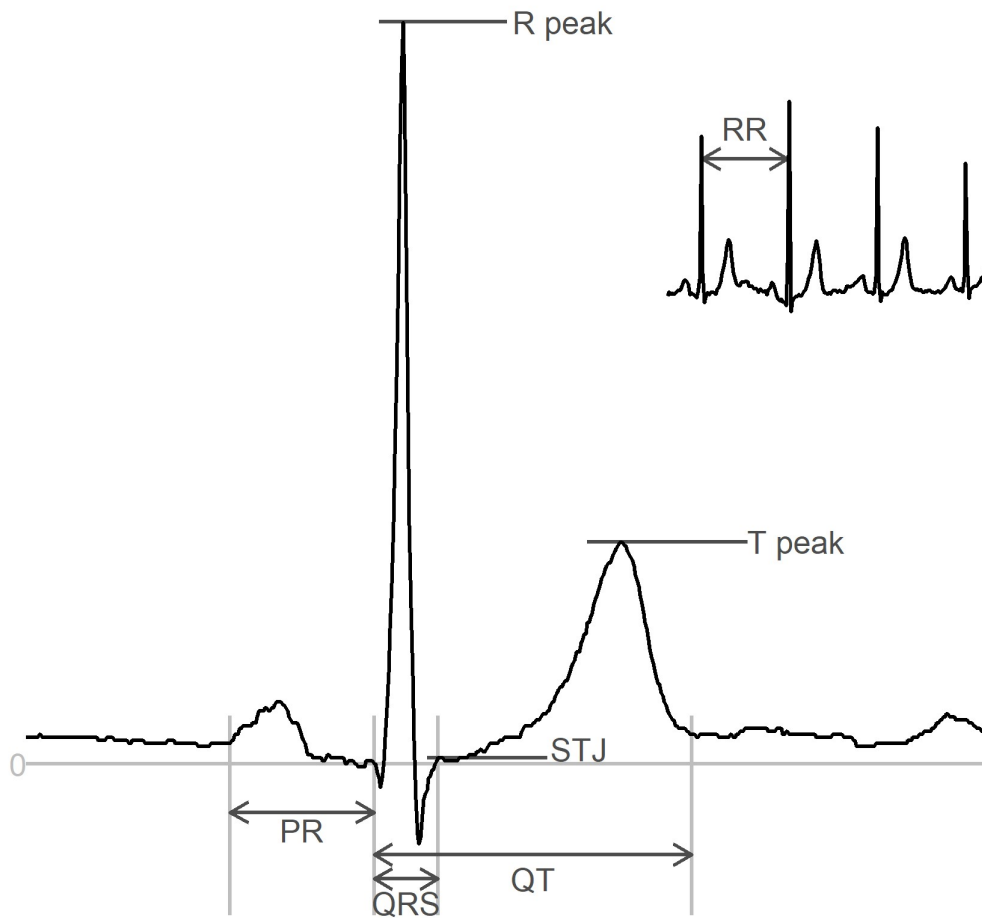

**Figure S1.** An annotated ECG representative beat and rhythm strip (top-right inset) with intervals (PR, QRS, QT) and amplitudes (Rpeak, STJ, Tpeak). Amplitudes are measured with respect to the baseline. STJ denotes J-point elevation. Heart rate is calculated as  $HR = 60,000/RR$  where RR is measured in milliseconds.
