# Supplementary material for: Explaining Deep Neural Networks for Knowledge Discovery in Electrocardiogram Analysis
Source: bioRxiv or medRxiv preprint supplement (doi:10.1101/2021.01.06.20248927), 2021-01-08
Supplement: Supplementary file [file media-2.pdf]

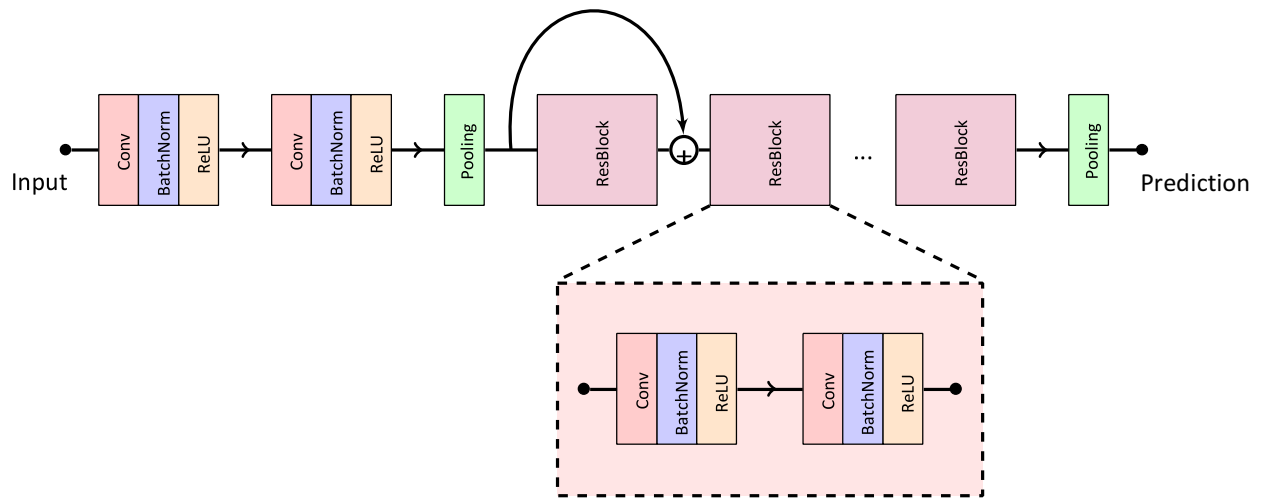

**Figure S2.** The convolutional neural network-based architecture used for all experiments.
