# Supplementary material for: Explaining Deep Neural Networks for Knowledge Discovery in Electrocardiogram Analysis
Source: bioRxiv or medRxiv preprint supplement (doi:10.1101/2021.01.06.20248927), 2021-01-08
Supplement: Supplementary file [file media-3.pdf]

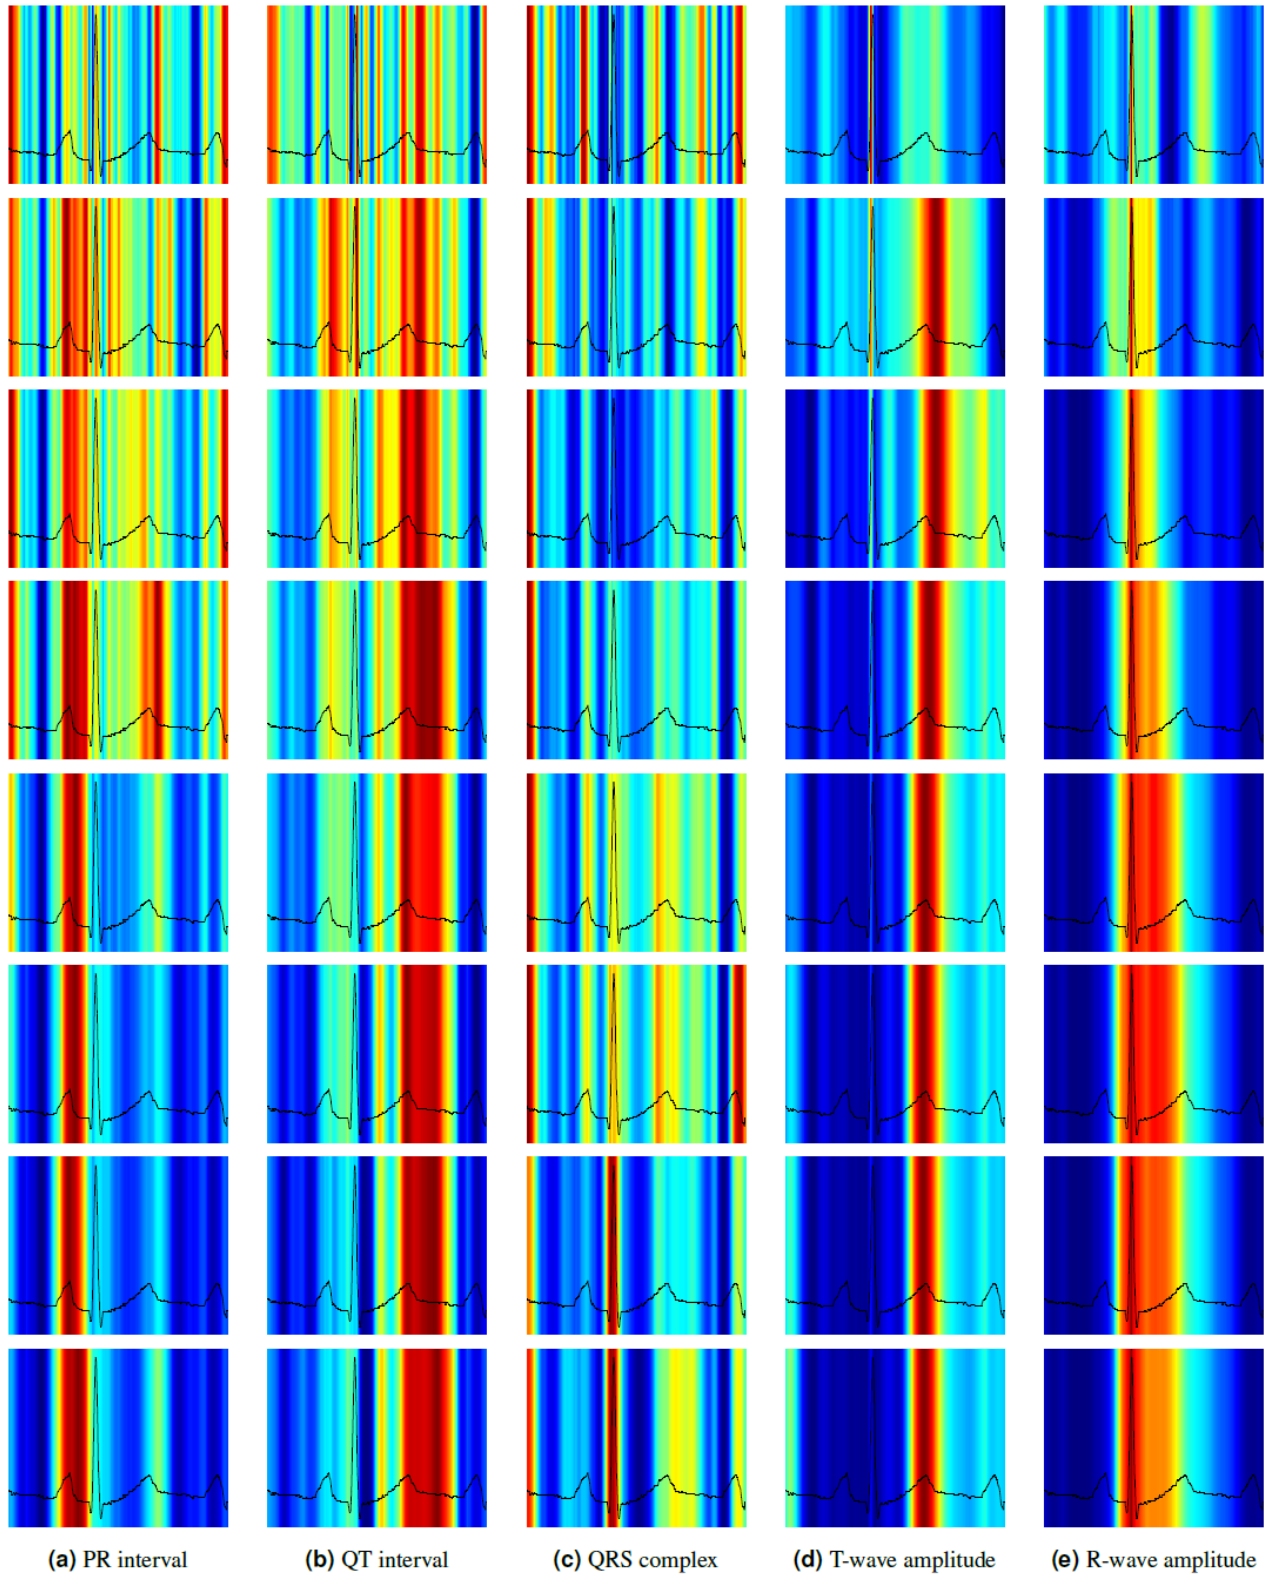

**Figure S3.** Attention maps from intermediate convolutions. First row is last convolution in the first residual block, second row is last convolution in second residual block etc.
